# Supplementary material for: A tumor volume and performance status model to predict outcome before treatment in diffuse large B-cell lymphoma
Source: PubMed Central journal article supplement — Blood Adv. 2022 Sep 2;6(23):5995–6004. doi: 10.1182/bloodadvances.2021006923 (PMC9691911; doi:10.1182/bloodadvances.2021006923), 2022-09-02

## **Supplemental Tables and Figures - MS#ADV-2021-006923R3**

**Supplemental Table 1. Main characteristics of the two clinical trials (GOYA, PETAL) and the real-world series**

**Supplemental Table 2. Clinical characteristics of patients stratified by age (<60 years and ≥60 years) and by series**

**Supplemental Table 3 .Calibration methodology**

**Supplemental Figure 1.** Kaplan-Meier estimates of survival (progression-free and overall) according to risk groups based on the risk factors TMTV >220 cm<sup>3</sup> and ECOG-PS ≥2, in the REMARC study

**Supplemental Figure 2.** Kaplan-Meier estimates of survival (progression-free and overall) according to risk groups based on the IPI.

**Supplemental Figure 3.** Kaplan-Meier estimates of survival (progression-free and overall) according to risk groups based on the risk factors TMTV >220 cm<sup>3</sup> and ECOG-PS ≥2 in the PETAL (A, B), GOYA (C,D) and real-world (E,F) series in patients aged <60 years.

**Supplemental Figure 4.** Kaplan-Meier estimates of survival (progression-free and overall) according to risk groups based on the risk factors TMTV >220 cm<sup>3</sup> and ECOG-PS ≥2 in the PETAL (A, B), GOYA (C,D) and real-world (E,F) series in patients aged ≥60 years.

**Supplemental Table 1. Main characteristics of the two clinical trials (GOYA, PETAL) and the real-world series**

| <b>Study name</b>        | <b>Clinical trial identifier<br/>Phase<br/>N patients</b> | <b>Inclusion period</b>        | <b>N centers and location</b> | <b>Patient characteristics</b>                                                                                                                                                                              | <b>Treatment</b>                                                                                                                                                                                                     |
|--------------------------|-----------------------------------------------------------|--------------------------------|-------------------------------|-------------------------------------------------------------------------------------------------------------------------------------------------------------------------------------------------------------|----------------------------------------------------------------------------------------------------------------------------------------------------------------------------------------------------------------------|
| <b>GOYA</b>              | NCT01287741<br>Phase III<br>n=1315                        | July 2011 to June 2014         | 207 centers in 29 countries   | Previously untreated DLBCL, ECOG-PS 0-2, and either IPI $\geq 2$ or IPI = 1 with or without bulky disease (defined as one lesion $\geq 7.5$ cm), or with an IPI = 0 and bulky disease, aged $\geq 18$ years | Obinutuzumab (Gazyva/Gazyvaro) G-CHOP versus R-CHOP                                                                                                                                                                  |
| <b>PETAL</b>             | NCT00554164<br>Phase III<br>n= 510                        | November 2007 to December 2012 | 23 German centers             | Untreated aggressive CD20-positive lymphoma with ECOG-PS 0-3<br><br>(patients with T-cell lymphoma were excluded)                                                                                           | After 2 cycles of R-CHOP, PET-positive patients with untreated aggressive CD20-positive lymphoma with ECOG-PS $\leq 3$ were randomly assigned to treatment, 4 cycles of R-CHOP $\pm 2$ additional doses of rituximab |
| <b>Real world series</b> | n=349                                                     | 2004 to 2016                   | 4 European centers            | Patients aged $\geq 18$ years, with DLBCL                                                                                                                                                                   | R-CHOP, 6 or 8 cycles                                                                                                                                                                                                |

**Supplemental Table 2. Clinical characteristics of patients stratified by age (<60 years and ≥60 years) and by series**

| Characteristic, n (%)            | Age <60 years      |                   |                                  | Age ≥60 years    |                 |                                 |
|----------------------------------|--------------------|-------------------|----------------------------------|------------------|-----------------|---------------------------------|
|                                  | PETAL<br>(n = 229) | GOYA<br>(n = 557) | Real-world<br>series<br>(n = 94) | PETAL<br>(n=280) | GOYA<br>(n=758) | Real-world<br>series<br>(n=234) |
| <b>Median age, years (range)</b> | 50 (18-59)         | 49 (18-59)        | 48.5 (17-59)                     | 69 (60-80)       | 68 (60-86)      | 69 (60-80)                      |
| <b>Sex</b>                       |                    |                   |                                  |                  |                 |                                 |
| <b>Male</b>                      | 126 (55.0)         | 245 (44.0)        | 53 (56.4)                        | 153 (54.6)       | 386 (50.9)      | 109 (46.6)                      |
| <b>Female</b>                    | 103 (45.0)         | 312 (56.0)        | 41 (43.6)                        | 127 (45.4)       | 372 (49.1)      | 125 (53.4)                      |
| <b>Histology</b>                 |                    |                   |                                  |                  |                 |                                 |
| <b>DLBCL NOS</b>                 | 198 (86.5)         | 508 (91.2)        | 16 (84.2)                        | 280 (100)        | 678 (89.4)      | 155 (92.3)                      |
| <b>FL grade 3B</b>               | 14 (6.1)           | 0 (0)             | 0 (0)                            | 0 (0)            | 0 (0)           | 0 (0)                           |
| <b>De novo transformed</b>       | 17 (7.4)           | 0 (0)             | 0 (0)                            | 0 (0)            | 0 (0)           | 10 (6.0)                        |
| <b>Other</b>                     | 0 (0)              | 49 (8.8)          | 3 (15.8)                         | 0 (0)            | 80 (10.6)       | 3 (1.8)                         |
| <b>Missing</b>                   | 0                  | 0                 | 75                               | 0                | 0               | 66                              |
| <b>ECOG-PS</b>                   |                    |                   |                                  |                  |                 |                                 |
| <b>0–1</b>                       | 211 (93.4)         | 490 (88.0)        | 79 (84.0)                        | 240 (86.0)       | 662 (87.3)      | 167 (71.4)                      |
| <b>≥ 2</b>                       | 15 (6.6)           | 67 (12.0)         | 15 (16.0)                        | 39 (14.0)        | 96 (12.7)       | 67 (28.6)                       |
| <b>Missing</b>                   | 3                  | 0                 | 0                                | 0                | 0               | 0                               |
| <b>Ann Arbor stage</b>           |                    |                   |                                  |                  |                 |                                 |
| <b>I-II</b>                      | 101 (44.3)         | 135 (24.2)        | 39 (41.5)                        | 113 (40.4)       | 179 (23.6)      | 49 (20.9)                       |
| <b>III-IV</b>                    | 127 (55.7)         | 422 (75.8)        | 55 (58.5)                        | 167 (59.6)       | 579 (76.4)      | 185 (79.1)                      |
| <b>Missing</b>                   | 1                  | 0                 | 0                                | 0                | 0               | 0                               |
| <b>Extranodal sites</b>          |                    |                   |                                  |                  |                 |                                 |
| <b>&lt; 2</b>                    | 156 (68.4)         | 353 (63.4)        | 61 (64.9)                        | 193 (68.9)       | 501 (66.1)      | 138 (62.2)                      |
| <b>≥ 2</b>                       | 72 (31.6)          | 204 (36.6)        | 33 (35.1)                        | 87 (31.1)        | 257 (33.9)      | 84 (37.8)                       |
| <b>Missing</b>                   | 0                  | 0                 | 1                                | 0                | 0               | 12                              |
| <b>Elevated LDH (&gt; ULN)</b>   |                    |                   |                                  |                  |                 |                                 |

| Characteristic, n (%)                | Age <60 years      |                   |                                  | Age ≥60 years    |                     |                                 |
|--------------------------------------|--------------------|-------------------|----------------------------------|------------------|---------------------|---------------------------------|
|                                      | PETAL<br>(n = 229) | GOYA<br>(n = 557) | Real-world<br>series<br>(n = 94) | PETAL<br>(n=280) | GOYA<br>(n=758)     | Real-world<br>series<br>(n=234) |
| <b>No</b>                            | 101 (44.3)         | 235 (42.2)        | 40 (43.0)                        | 121 (43.2)       | 323 (42.6)          | 82 (35.0)                       |
| <b>Yes</b>                           | 127 (55.7)         | 322 (57.8)        | 53 (57.0)                        | 159 (56.8)       | 431 (56.9)          | 152 (65.0)                      |
| <b>Missing</b>                       | 1                  | 0                 | 1                                | 0                | 4                   | 0                               |
| <b>aalPI</b>                         |                    |                   |                                  |                  |                     |                                 |
| <b>0–1</b>                           | 137 (60.4)         | 293 (52.6)        | 50 (53.2)                        | 153 (54.6)       | 393 (51.8)          | 89 (38.0)                       |
| <b>2–3</b>                           | 90 (39.7)          | 264 (47.4)        | 44 (46.8)                        | 127 (45.4)       | 365 (48.2)          | 145 (62.0)                      |
| <b>IPI</b>                           |                    |                   |                                  |                  |                     |                                 |
| <b>0-2</b>                           | 176 (77.2)         | 417 (74.9)        | 60 (63.8)                        | 138 (49.3)       | 319 (42.1)          | 76 (32.5)                       |
| <b>3-5</b>                           | 52 (22.8)          | 140 (25.1)        | 34 (36.2)                        | 142 (50.7)       | 439 (57.9)          | 158 (67.5)                      |
| <b>Missing</b>                       | 1                  | 0                 | 0                                | 0                | 0                   | 0                               |
| <b>Treatment</b>                     |                    |                   |                                  |                  |                     |                                 |
| <b>R-CHOP</b>                        | 222 (96.9)         | 274 (49.2)        | 94 (100)                         | 263 (93.9)       | 380 (50.1)          | 234 (100)                       |
| <b>G-CHOP</b>                        | -                  | 283 (50.8)        | -                                | -                | 378 (49.9)          | -                               |
| <b>Intensified CHOP / CHOP</b>       | 7 (3.1)            | -                 | -                                | 17 (6.1)         | -                   | -                               |
| <b>TMTV</b>                          |                    |                   |                                  |                  |                     |                                 |
| <b>Median cm<sup>3</sup> (range)</b> | 178<br>(1-6750)    | 311.7<br>(2-8113) | 153<br>(0-2416)                  | 173<br>(1-8896)  | 250.8<br>(1.7-5334) | 207.2<br>(0-3764)               |
| <b>TMTV &gt;220 cm<sup>3</sup></b>   | 109 (47.6)         | 333 (59.8)        | 34 (36.2)                        | 121 (43.2)       | 392 (51.7)          | 114 (48.7)                      |
| <b>TMTV and ECOG-PS risk factors</b> |                    |                   |                                  |                  |                     |                                 |
| <b>0 factor</b>                      | 119 (52.0)         | 207 (37.2)        | 56 (59.6)                        | 151 (54.1)       | 346 (45.6)          | 98 (41.9)                       |
| <b>1 factor</b>                      | 96 (41.9)          | 300 (53.9)        | 27 (28.7)                        | 96 (34.4)        | 336 (44.3)          | 91 (38.9)                       |
| <b>2 factors</b>                     | 14 (6.1)           | 50 (9.0)          | 11 (11.7)                        | 32 (11.5)        | 76 (10.0)           | 45 (19.2)                       |

\* TMTV > 220 cm<sup>3</sup> and ECOG-PS ≥2

### Supplemental Table 3 .Calibration methodology

Initially proposed for microarrays and then validated for several imaging biomarkers in PET (Orlhac et al J Nucl Med 2018), CT (Orlhac et al Radiology 2019) and MR (Orlhac et al Eur Rad 2021), the ComBat approach estimates the location (mean) and/or scale (variance) (L/S) adjustments needed to align the statistical distributions of a given biomarker measured under different conditions. Here, we applied this approach to all patients from the phase III GOYA trial (NCT01287741) with available TMTV to a cohort within the phase III REMARC trial (NCT01122472).

Following the language as described for microarrays in ComBat, assuming  $TMTV_{ij}$  represents the total metabolic tumor volume for sample  $j$  from clinical trial  $i$ . We define a L/S model that assumes:

$$TMTV_{ij} = \alpha + X\beta + \gamma_i + \delta_i e_{ij}$$

where  $TMTV_{ij}$  is the overall TMTV expression,  $X$  is a design matrix for sample conditions, and  $\beta$  is the vector of regression coefficients corresponding to  $X$ . The error terms,  $e_{ij}$  can be assumed to follow a Normal distribution with expected value of zero and variance  $\sigma^2$ . The  $i$  and  $j$  represent the additive and multiplicative trial effects for trial  $i$ . The trial-adjusted data,  $TMTV_{ij}^*$ , are given by

$$TMTV_{ij}^* = \frac{TMTV_{ij} - \hat{\alpha} + X\hat{\beta} - \hat{\gamma}_i}{\hat{\delta}_i} + \hat{\alpha} + X\hat{\beta}$$

Where  $\hat{\alpha}$ ,  $\hat{\beta}$ ,  $\hat{\gamma}_i$ , and  $\hat{\delta}_i$  are the estimators for respective parameters  $\alpha$ ,  $\beta$ ,  $\gamma_i$ , and  $\delta_i$ .

We applied the ComBat L/S adjustment to 1315 patients with available TMTV measurements from the phase III GOYA trial and leveraged 301 patients from the phase III REMARC trial as a reference using study and age  $\geq 60$  years as an indicator variable in our model matrix.

**Supplemental Figure 1.** Kaplan-Meier estimates of survival (progression-free and overall) according to risk groups based on the risk factors TMTV >220 cm<sup>3</sup> and ECOG-PS ≥2, in the REMARC study.

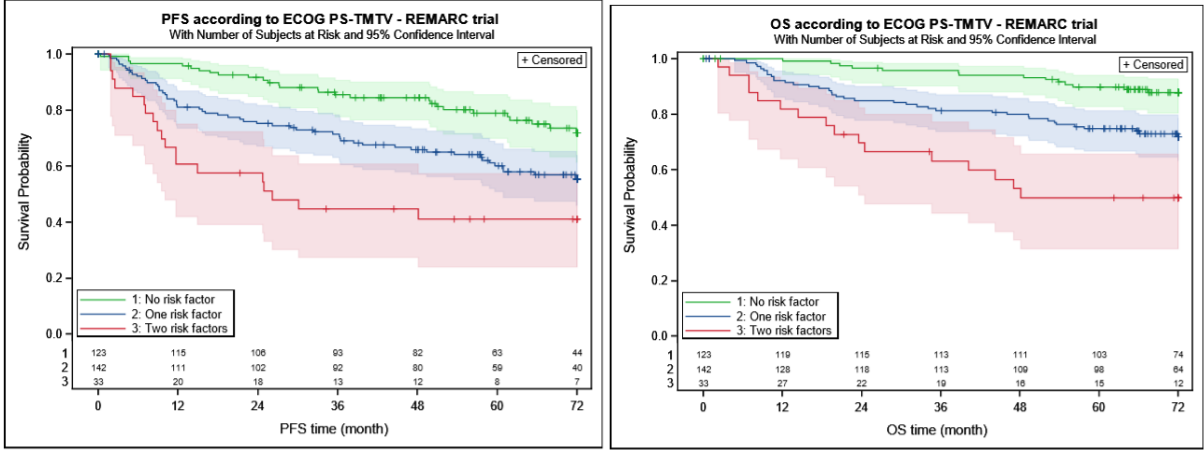

**Supplemental Figure 2.** Kaplan-Meier estimates of survival (progression-free and overall) according to risk groups based on the IPI.

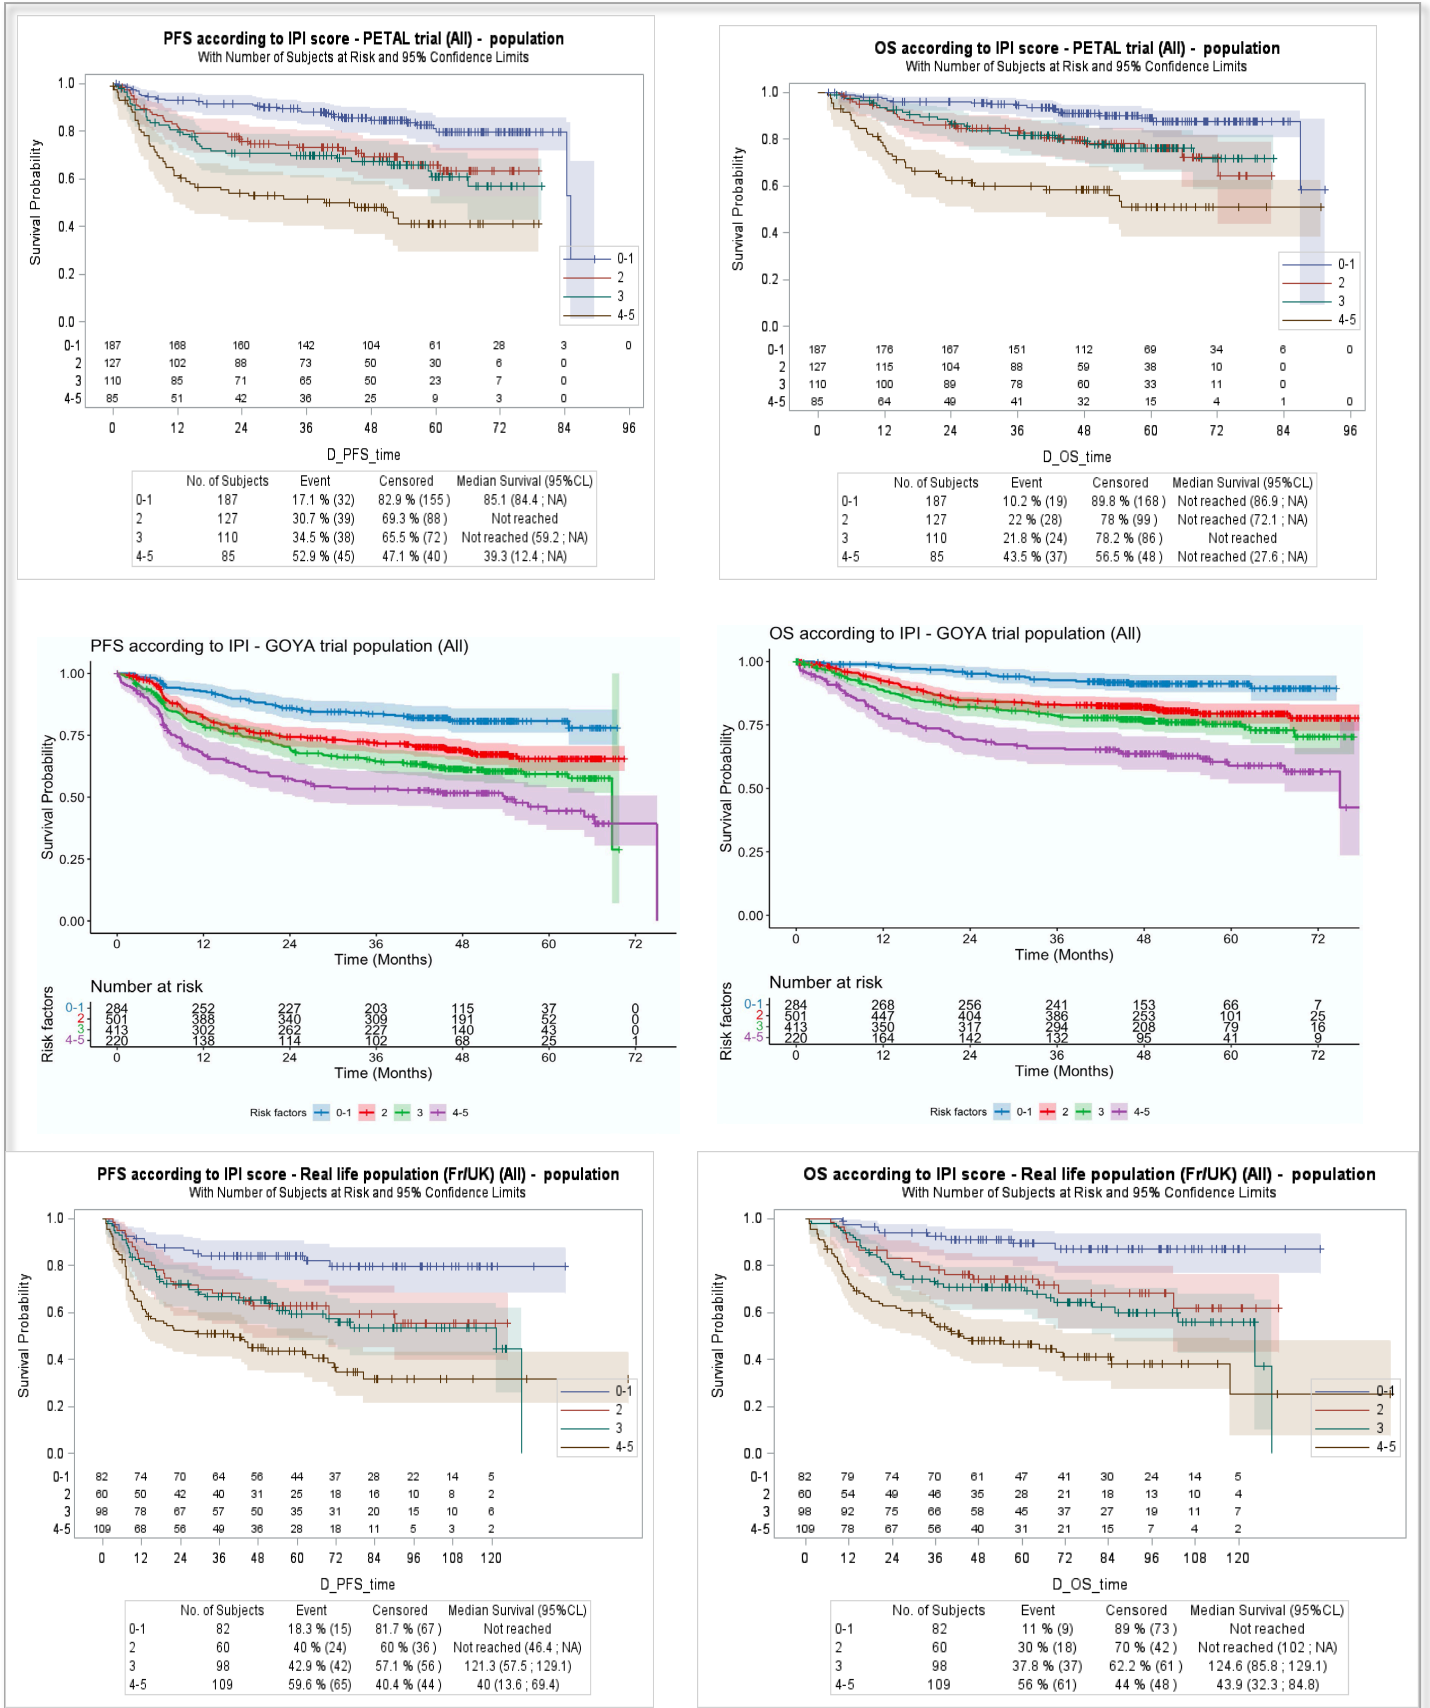

**Supplemental Figure 3.** Kaplan-Meier estimates of survival (progression-free and overall) according to risk groups based on the risk factors TMTV >220 cm<sup>3</sup> and ECOG-PS ≥2 in the PETAL (A, B), GOYA (C,D) and real-world (E,F) series in patients aged <60 years.

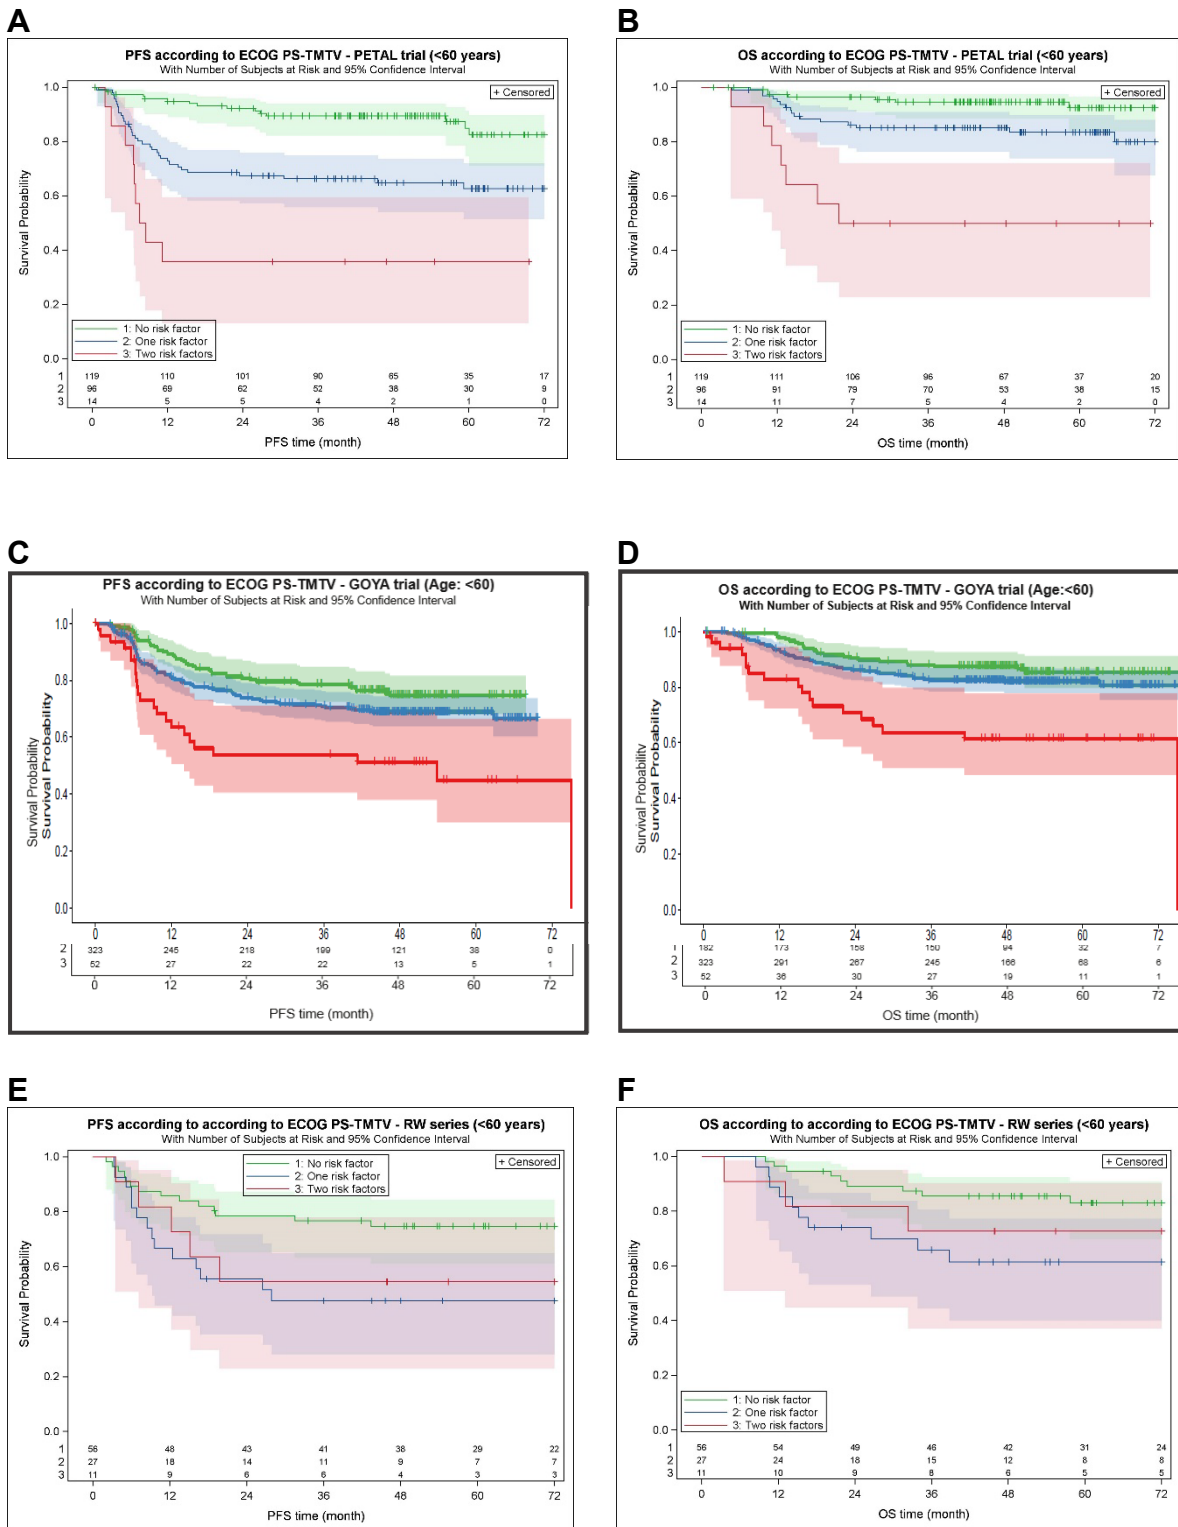



**Supplemental Figure 4.** Kaplan-Meier estimates of survival (progression-free and overall) according to risk groups based on the risk factors TMTV >220 cm<sup>3</sup> and ECOG-PS ≥2 in the PETAL (A, B), GOYA (C,D) and real-world (E,F) series in patients aged ≥60 years.

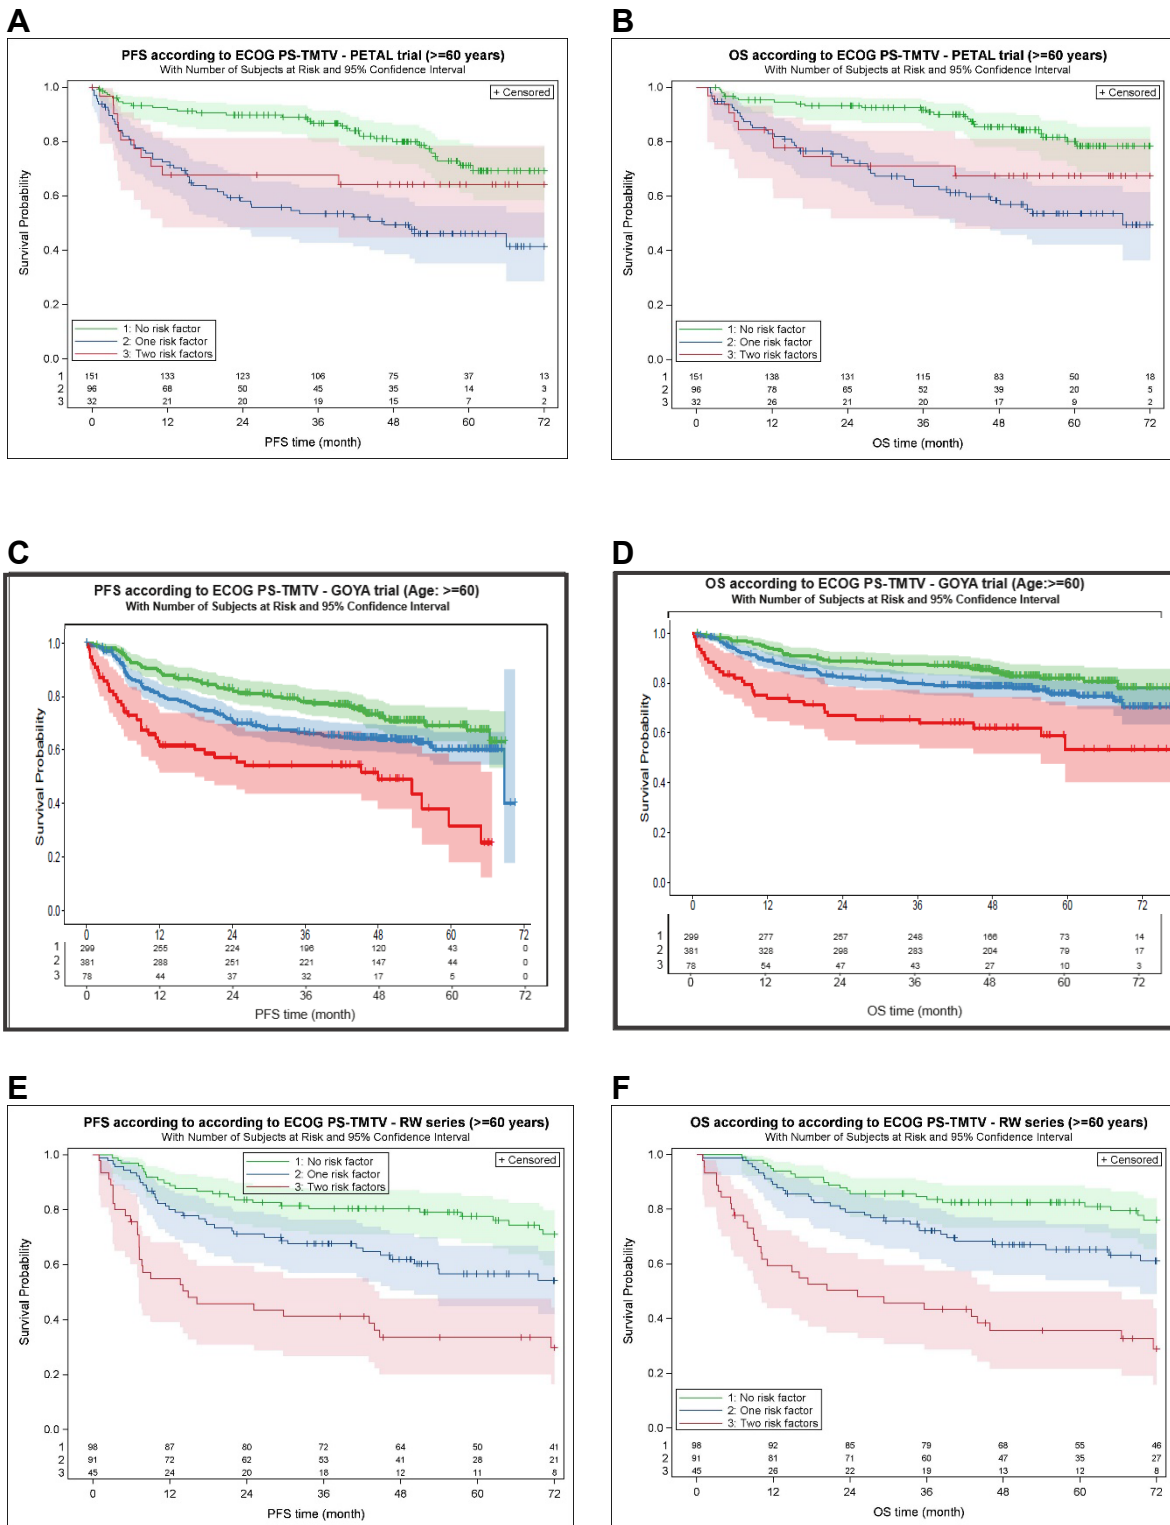

Supplement: BLOODA_ADV-2021-006923-mmc1.pdf [file BLOODA_ADV-2021-006923-mmc1.pdf]
